# Supplementary material for: Verification of the Interaction Target Protein of the Effector ApCE22 of Arthrinium phaeospermum in Bambusa pervariabilis × Dendrocalamopsis grandis
Source: MDPI journal article supplement (doi:10.3390/biom13040590), 2023-03-25
Supplement: s1 [file s1]

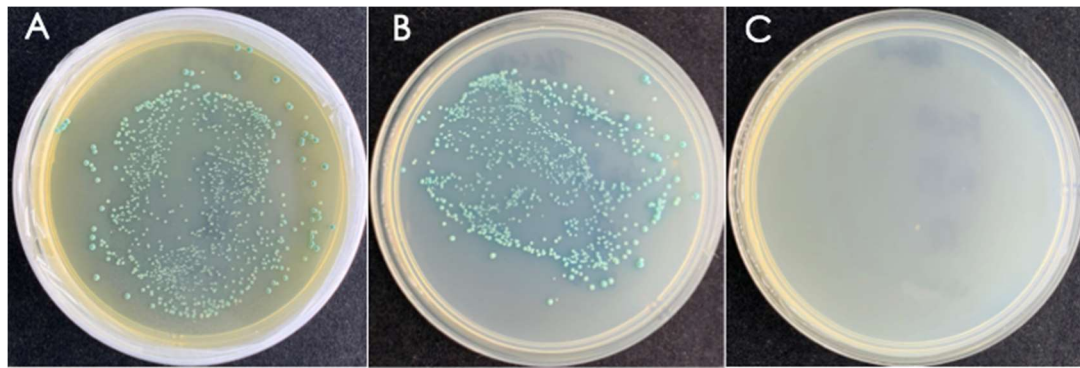

**Figure S1.** Self-activation detection of pGBKT7-ApCE22. Note: A: The reaction of the pGBKT7-ApCE22 bait and pGADT7-T was spread on the SD/-Leu/-Trp/X-α-gal medium. B: The reaction of the pGBKT7-ApCE22 bait and pGADT7-T was spread on the SD/-Leu/-Trp/-His/X-α-gal medium. C: The reaction of the pGBKT7-ApCE22 bait and pGADT7-T was spread on the SD/-Leu/-Trp/-His/-Ade/X-α-gal/AbA medium

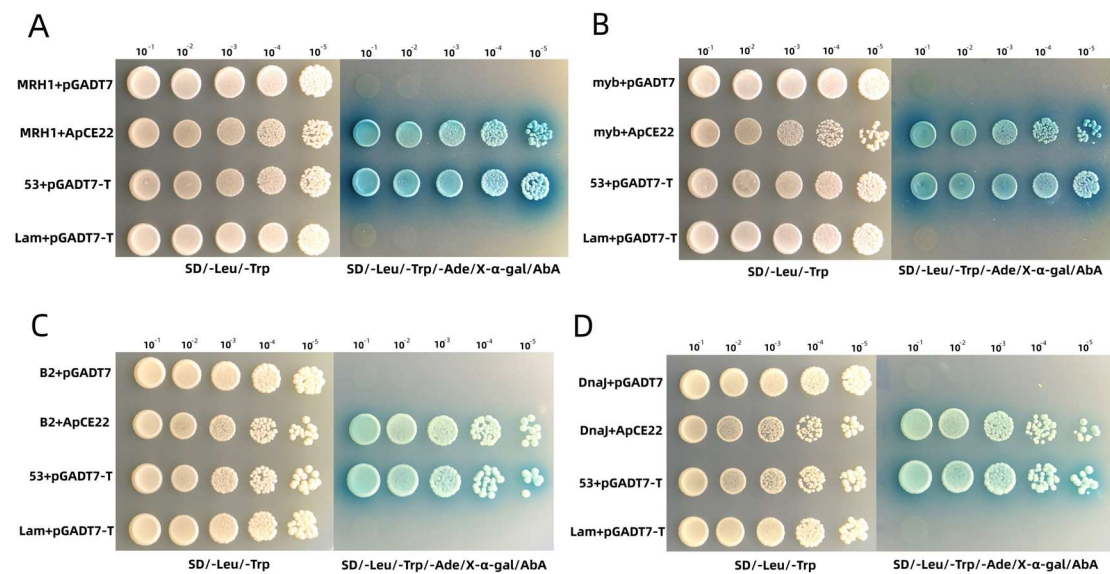

**Figure S2.** One-to-one yeast two-hybrid results of ApCE22 and the interacting proteins. Note: Interaction proteins were as a bait protein, and ApCE22 protein was as a prey protein.

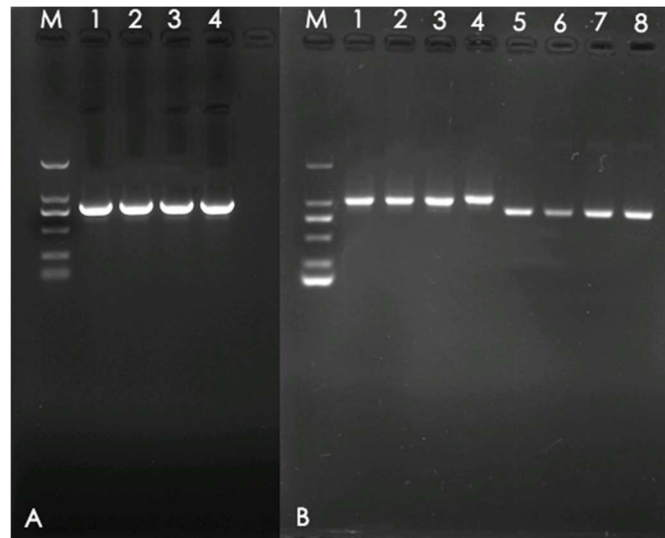

**Figure S3.** The gene detection results of recombinant plasmid pSPYNE(R) 173-ApCE22, pSPYCE(M)-B2 and pSPYCE(M)-DnaJ. M: DL2000 DNA marker, The labels of the ladder from top to bottom represent 2000, 1000, 750, 500, 250 and 100bp, respectively; 1, 2, 3, 4: ApCE22 gene of pSPYNE(R) 173-ApCE22 was detected by primer ApCE22-F/R; B: pSPYCE(M)-B2. M: DL2000 DNA marker, The labels of the ladder from top to bottom represent 2000, 1000, 750, 500, 250 and 100bp, respectively; 1, 2, 3, 4: B2 gene of pSPYCE(M)-B2 was detected by primer B2-F/R. 5, 6, 7, 8: DnaJ gene of pSPYCE(M)-DnaJ was detected by primer DnaJ-F/R.

```
# WEBSSEQUENCE Length: 256
# WEBSSEQUENCE Number of predicted TMHs: 0
# WEBSSEQUENCE Exp number of AAs in TMHs: 0.82391
# WEBSSEQUENCE Exp number, first 60 AAs: 0.11594
# WEBSSEQUENCE Total prob of N-in: 0.16261
WEBSSEQUENCE TMHMM2.0 outside 1 256
```

A

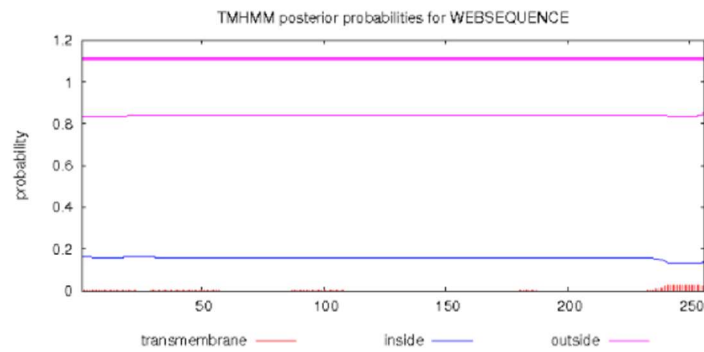

# [plot](#) in postscript, [script](#) for making the plot in gnuplot, [data](#) for plot

```
# SignalP-4.0 euk predictions
Sequence
```

B

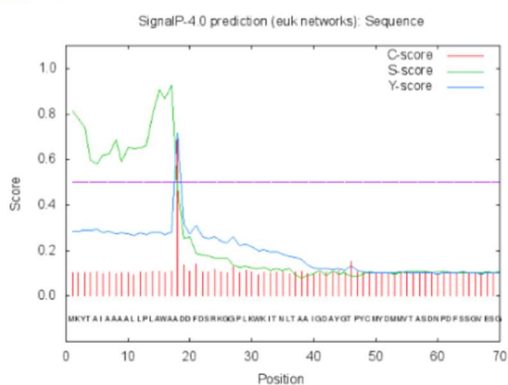

```
# Measure Position Value Cutoff signal peptide?
max. C 18 0.694
max. Y 18 0.715
max. S 17 0.927
mean S 1-17 0.714
D 1-17 0.715 0.450 YES
Name=Sequence SP= YES Cleavage site between pos. 17 and 18: AWA-AD D=0.715 D-cutoff=0.450 Networks=SignalP-noTM
```

C

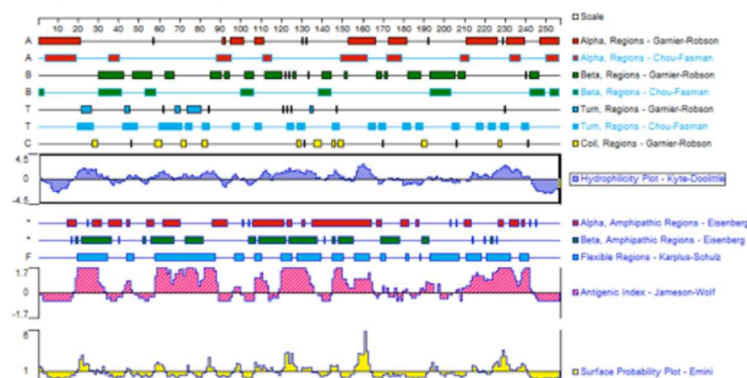

**Figure S4.** Analysis of transmembrane region, signal peptide and hydrophobicity of effector ApCE22 sequence

## TMHMM result

```
# WEBSEQUENCE Length: 345
# WEBSEQUENCE Number of predicted TMs: 0
# WEBSEQUENCE Exp number of AAs in TMs: 0.004390000000000001
# WEBSEQUENCE Exp number, first 60 AAs: 0.00097
# WEBSEQUENCE Total prob of N-in: 0.01697
WEBSEQUENCE TMHMM: 0      outside 1 345
```

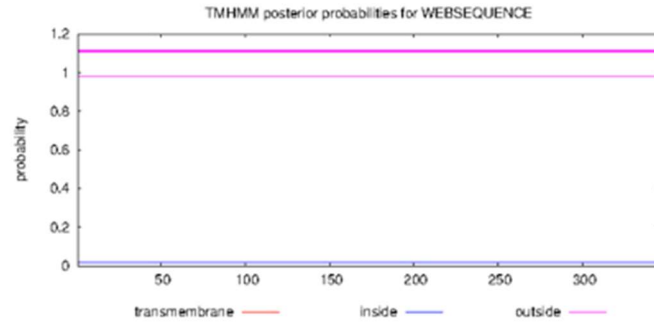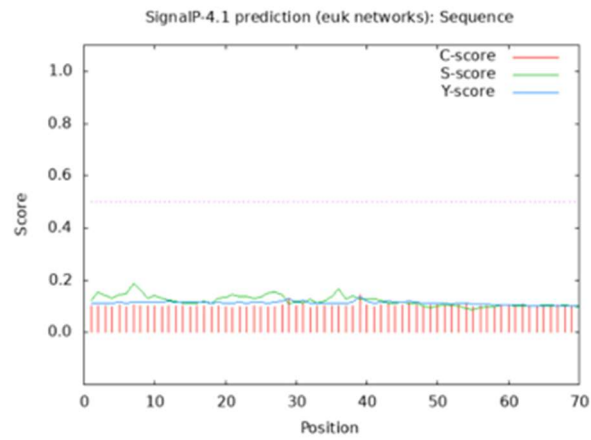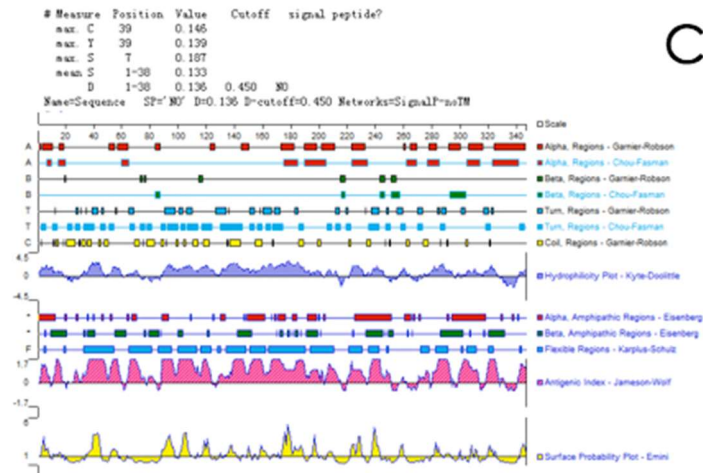

Figure S5. Analysis of transmembrane region, signal peptide and hydrophilicity of effector B2 sequence

## TMHMM result

```
# WEBSEQUENCE Length: 285
# WEBSEQUENCE Number of predicted TMs: 0
# WEBSEQUENCE Exp number of AAs in TMs: 0.07007
# WEBSEQUENCE Exp number, first 50 AAs: 0.06063
# WEBSEQUENCE Total prob of N-in: 0.02358
# WEBSEQUENCE TMHMM2.0 outside 1 285
```

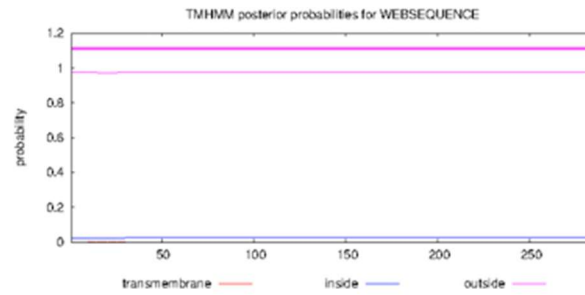

```
# SignalP-4.1 euk predictions
>Sequence
```

SignalP-4.1 prediction (euk networks): Sequence

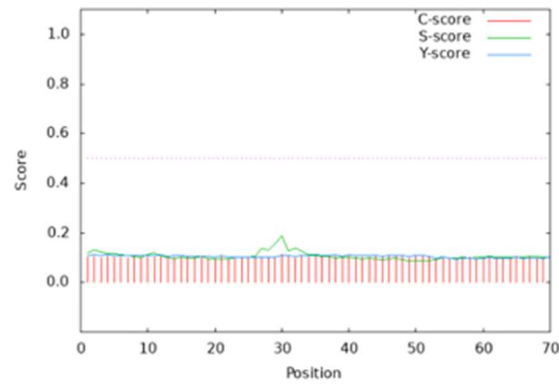

```
# Measure Position Value Cutoff signal peptide?
max. C 30 0.111
max. T 35 0.112
max. S 30 0.109
mean S 1-34 0.114
D 1-34 0.113 0.450 NO
```

WebSequence SF= 807 D=0.113 D-cutoff=0.450 Networks=SignalP-noTM

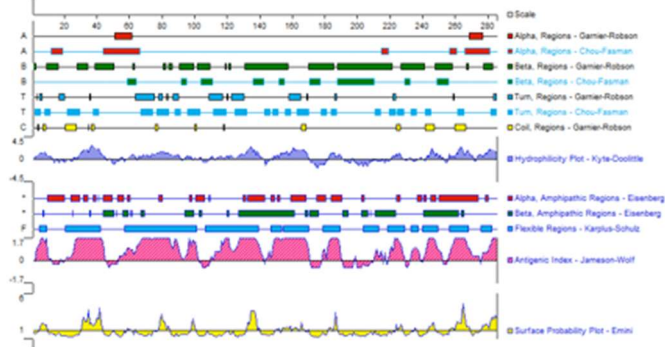

**Figure S6.** Analysis of transmembrane region, signal peptide and hydrophilicity of effector ChaJA6 sequence

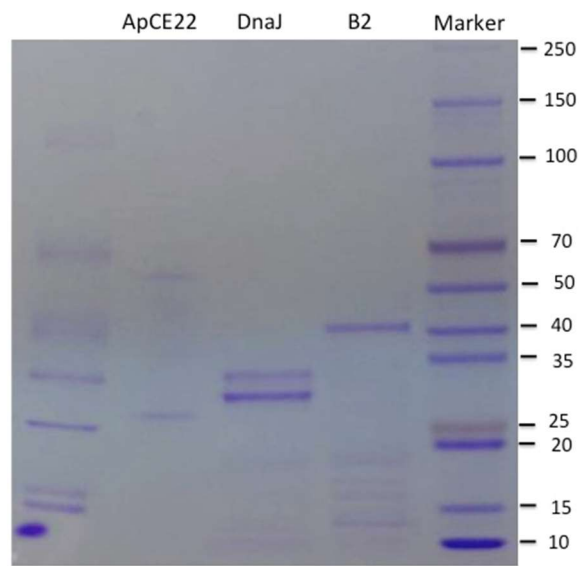

**Figure S7.** Electrophoresis results of the purified protein of the effector ApCE22, and the target proteins B2 and DnaJ. M: DL250KD protein marker, 1: ApCE22 protein; 2: DnaJ protein; 3: B2 protein.

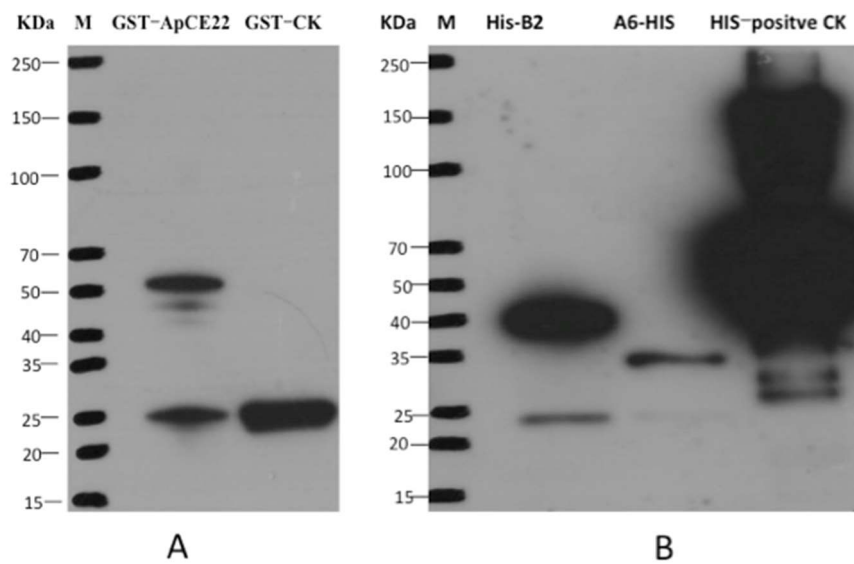

**Figure S8.** Western blot results of the effector ApCE22, the B2 protein and the DnaJ protein. Note: A: ApCE22 protein. B: B2 protein and DnaJ protein. M: DL250KD protein marker.

**Table S1.** Primer sequences of various expression vectors

| Primer name                 | Primer sequence 5'-3'                                         |
|-----------------------------|---------------------------------------------------------------|
| pGBKT7-B2-F                 | <u>AGGCCGAATCCCCGGGGATCC</u> ATGGAGGGATACGACCGCGAGT           |
| pGBKT7-B2-R                 | <u>CCGCTGCAGGTCGACGGATCC</u> TCAGGCATCATCCTTGTCTGCAAAGAT      |
| pGBKT7- DnaJ-F              | <u>AGGCCGAATCCCCGGGGATCC</u> ATGGGCACAGGAGATTACTCAAACCCGT     |
| pGBKT7- DnaJ -R             | <u>CCGCTGCAGGTCGACGGATCC</u> TCATCTCCTGCTATTGGCTGTTTGAGCCT    |
| pGBKT7-MRH1-F               | <u>AGGCCGAATCCCCGGGGATCC</u> ATGTCCCCGAGCTGGCCGG              |
| pGBKT7-MEH1-R               | <u>CCGCTGCAGGTCGACGGATCC</u> TCAGGTAGCTTCAGCAGACATGATC        |
| pGBKT7-myb-F                | <u>AGGCCGAATCCCCGGGGATCC</u> ATGGGGAGGGCGCCGTGCT              |
| pGBKT7-myb-R                | <u>CCGCTGCAGGTCGACGGATCC</u> TTAGCACGCGTCAGACAGGAGCCA         |
| pGBKT7-ApCE22-F             | <u>AGGCCGAATCCCCGGGGATCC</u> ATGAAGTACACCGCGATCGC             |
| pGBKT7-ApCE22-R             | <u>CCGCTGCAGGTCGACGGATCC</u> TTAAAGGACCATAGCCATAAGACC         |
| pGADT7-ApCE22-F             | <u>TGGGCATCGATACGGGATCC</u> ATGAAGTACACCGCGATCGC              |
| pGADT7-ApCE22-R             | <u>AGCTCGAGCTCGATGGATCC</u> TTAAAGGACCATAGCCATAAGACC          |
| pGADT7-B2-F                 | <u>TGGGCATCGATACGGGATCC</u> ATGGAGGGATACGACCGCGAGT            |
| pGADT7-B2-R                 | <u>AGCTCGAGCTCGATGGATCC</u> TCAGGCATCATCCTTGTCTGCAAAGAT       |
| pGADT7-DnaJ-F               | <u>TGGGCATCGATACGGGATCC</u> ATGGGCACAGGAGATTACTCAAACCCGT      |
| pGADT7- DnaJ 6-R            | <u>AGCTCGAGCTCGATGGATCC</u> TCATCTCCTGCTATTGGCTGTTTGAGCCT     |
| pGADT7-MRH1-F               | <u>TGGGCATCGATACGGGATCC</u> ATGTCCCCGAGCTGGCCGG               |
| pGADT7-MRH1-R               | <u>AGCTCGAGCTCGATGGATCC</u> TCAGGTAGCTTCAGCAGACATGATC         |
| pGADT7-myb-F                | <u>TGGGCATCGATACGGGATCC</u> ATGGGGAGGGCGCCGTGCT               |
| pGADT7-myb-R                | <u>AGCTCGAGCTCGATGGATCC</u> TTAGCACGCGTCAGACAGGAGCCA          |
| pSPYNE(R)173-ApCE22-F       | <u>GGGCCCAGGCCTACTAGTGGATCC</u> ATGAAGTACACCGCGATCGC          |
| pSPYNE(R)173- ApCE22-R      | <u>GGTACCCTCGAGGTCGACGGATCC</u> TTAAAGGACCATAGCCATAAGACC      |
| pSPYCE(M)-B2-F              | <u>GCCTGGCGCGCCACTAGTGGATCC</u> ATGGAGGGATACGACCGCGAGT        |
| pSPYCE(M)-B2-R              | <u>GTCGACAGTACTATCGATGGATCC</u> TCAGGCATCATCCTTGTCTGCAAAGAT   |
| pSPYCE(M)-DnaJ-F            | <u>GCCTGGCGCGCCACTAGTGGATCC</u> ATGGGCACAGGAGATTACTCAAACCCGT  |
| pSPYCE(M)-DnaJ-R            | <u>GTCGACAGTACTATCGATGGATCC</u> TCATCTCCTGCTATTGGCTGTTTGAGCCT |
| PGEX-6P-1- <i>ApCE22</i> -F | <u>CAGGGGCCCCCTGGGATCC</u> ATGAAGTACACCGCGATCGC               |
| PGEX-6P-1- <i>ApCE22</i> -R | <u>CGGGAATTCGGGGATCC</u> TTAAAGGACCATAGCCATAAGACC             |
| pET28a-B2-F                 | <u>CAAATGGGTTCGCGGATCC</u> ATGGAGGGATACGACCGCGAGT             |
| pET28a-B2-R                 | <u>GAGCTCGAATTCGGATCCT</u> CAGGCATCATCCTTGTCTGCAAAGAT         |
| pET28a-DnaJ-F               | <u>CAAATGGGTTCGCGGATCC</u> ATGGGCACAGGAGATTACTCAAACCCGT       |
| pET28a-DnaJ-R               | <u>GAGCTCGAATTCGGATCCT</u> CATCTCCTGCTATTGGCTGTTTGAGCCT       |

Note: the underline represents the upstream and downstream complementary sequence at the BamHI digestion site on the pGBKT7vector; the dashed underline represents the downstream complementary sequence at the upper and lower BamHI digestion sites of the pSPYNE(R)173 vector; the wavy lines represent the upstream and downstream complementary sequences at the BamHI digestion site on the pSPYCE(M) vector; the dot-dash underline represents the upstream and downstream complementary sequence at the BamHI digestion site on the PGEX-6P-1 vector; The bold underline represents the upstream and downstream complementary sequence at the BamHI digestion site on the pET28a vector. Double underscores represents the upstream and downstream complementary sequence at the BamHI digestion site on the pGADT7 vector.

**Table S2.** List of different plasmid ingredients in the self-activation and toxicity test.

| Plasmid 1(100ng) | Plasmid 2 (200ng) | Culture medium                     |
|------------------|-------------------|------------------------------------|
| pGBKT7-53        | pGAT7-T           | SD/-Trp/-Leu/X-a-gal               |
| pGBKT7-Lam       | pGAT7-T           | SD/-Trp/-Leu/X-a-gal               |
| pGBKT7-          | pGAT7-T           | SD/-Trp/-Leu/X-a-gal               |
| ApCE12/ApCE22    |                   | SD/-Trp/-Leu/-His/X-a-gal          |
|                  |                   | SD/-Trp/-Leu/-His/-Ade/X-a-gal/AbA |
| pGBKT7           |                   | SD/-Trp                            |
